# Supplementary material for: Comprehensive structure-function analysis reveals gain- and loss-of-function mechanisms impacting oncogenic KRAS activity
Source: PubMed Central journal article supplement (PMC11526993; doi:10.1101/2024.10.22.618529), 2024-10-25
Supplement: media-1.pdf [file media-1.pdf]

1 **Extended Data Figures**

2 **Extended Data Fig. 1**

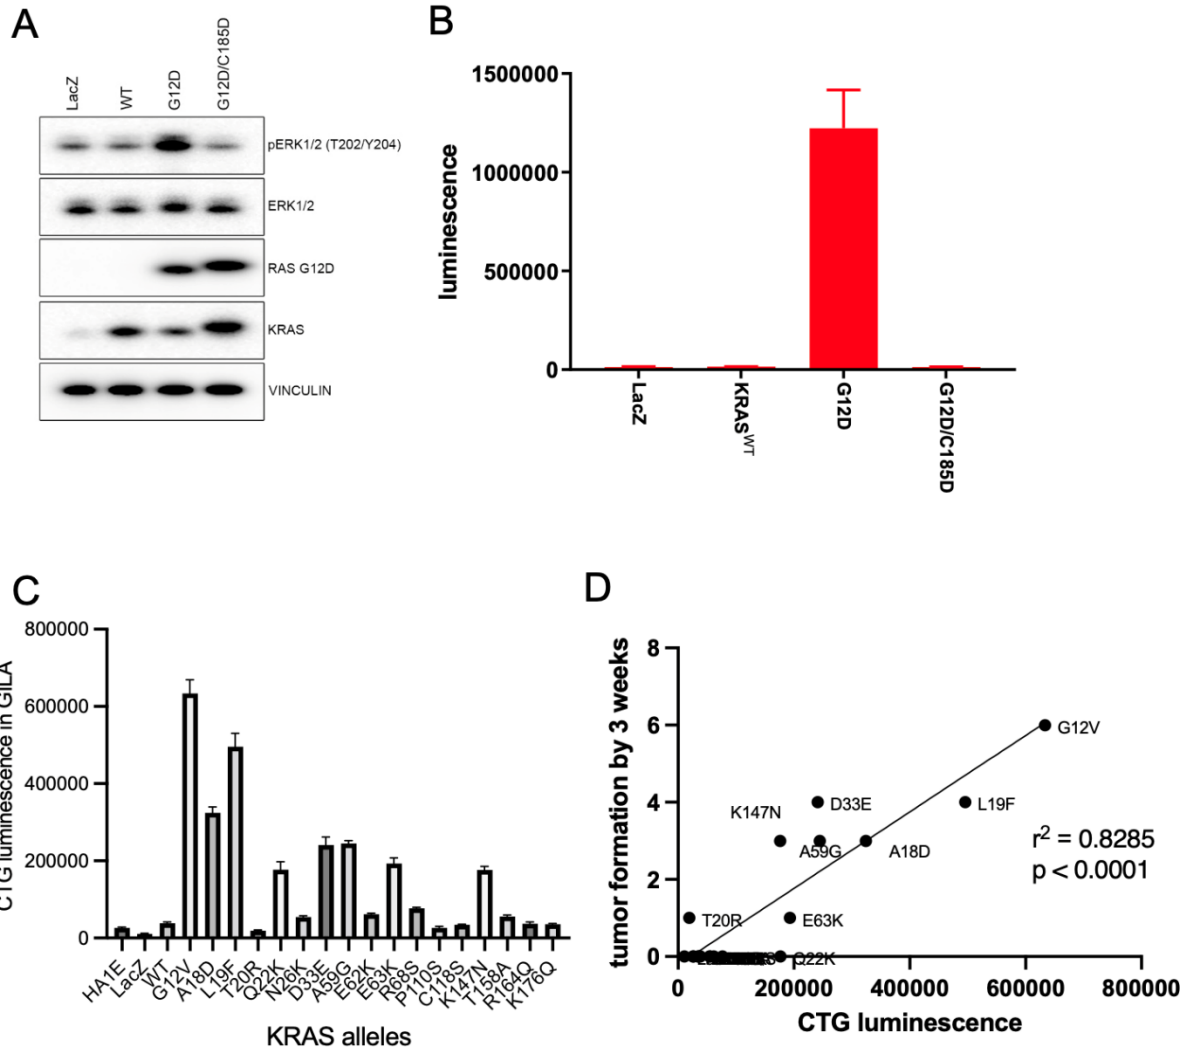

3

4 **Impact of KRAS<sup>G12D</sup> on HA1E growth in ultralow attachment.** HA1E cells were

5 transduced with lentivirus expressing LacZ, KRAS<sup>wt</sup>, KRAS<sup>G12D</sup> or KRAS<sup>G12D/C185D</sup> and

6 selected with puromycin at 1ug/ml. **(A)** KRAS expression and downstream signaling were

7 checked. **(B)** 1,000 of HA1E cells stably expressing each allele were grown in ultra-low

8 attachment wells for 7 days followed by CellTiter-Glo 3D assays. Evaluation of HA1E cells

9 stably expressing KRAS WT, G12V, A18D, L19F, T20R, Q22K, N26K, D33E, A59G,

10 E62K, E63K, R68S, P110S, C118S, K147N, T158A, R164Q, and K176Q on **(C)** growth

11 in low attachment and **(D)** *in vivo* growth.

12 Extended Data Fig. 2

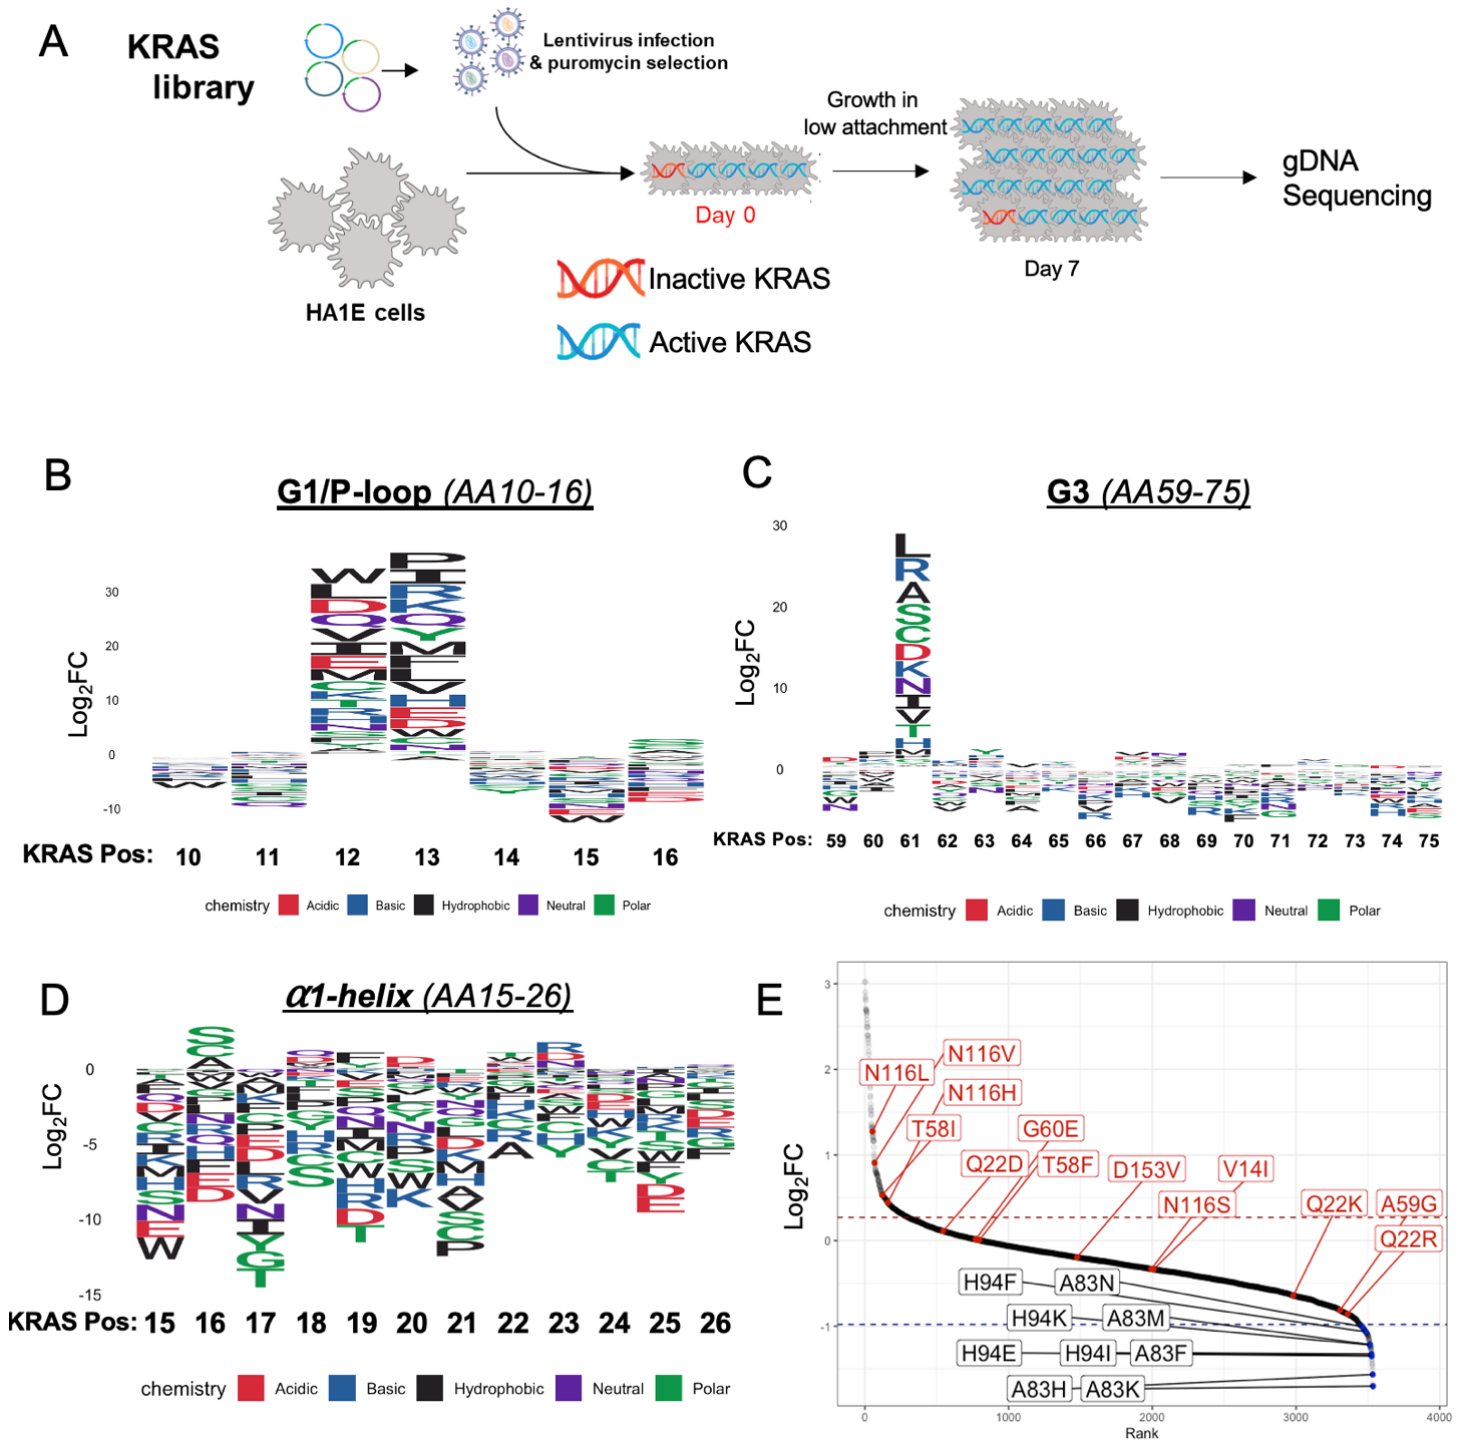

14 **KRAS Deep Mutational Scanning (DMS) gain-of-function screen.** (A) Schematic  
 15 overview of KRAS DMS gain-of-function (GOF) screen. Sequence logo plots of KRAS  
 16 DMS GOF screen results where the height of substituted amino acid indicates the log<sub>2</sub>

17 fold change (y-axis) for each amino acid position of KRAS (x-axis) for (B) G1 domain (C)  
18 G3 domain, and (D)  $\alpha$ 1-helix. (E) Waterfall plot of KRAS DMS GOF screen in rank order  
19 of each variant functional impact log<sub>2</sub> fold change. KRAS variants implicated in Noonan  
20 syndrome (red) and select loss-of-function mutants at positions A83 and H94 (black) are  
21 indicated.

22

23

24

25

26

27

28

29

30

31

32

33

34

35

36

37

38

39

40

41 **Extended Data Fig. 3**

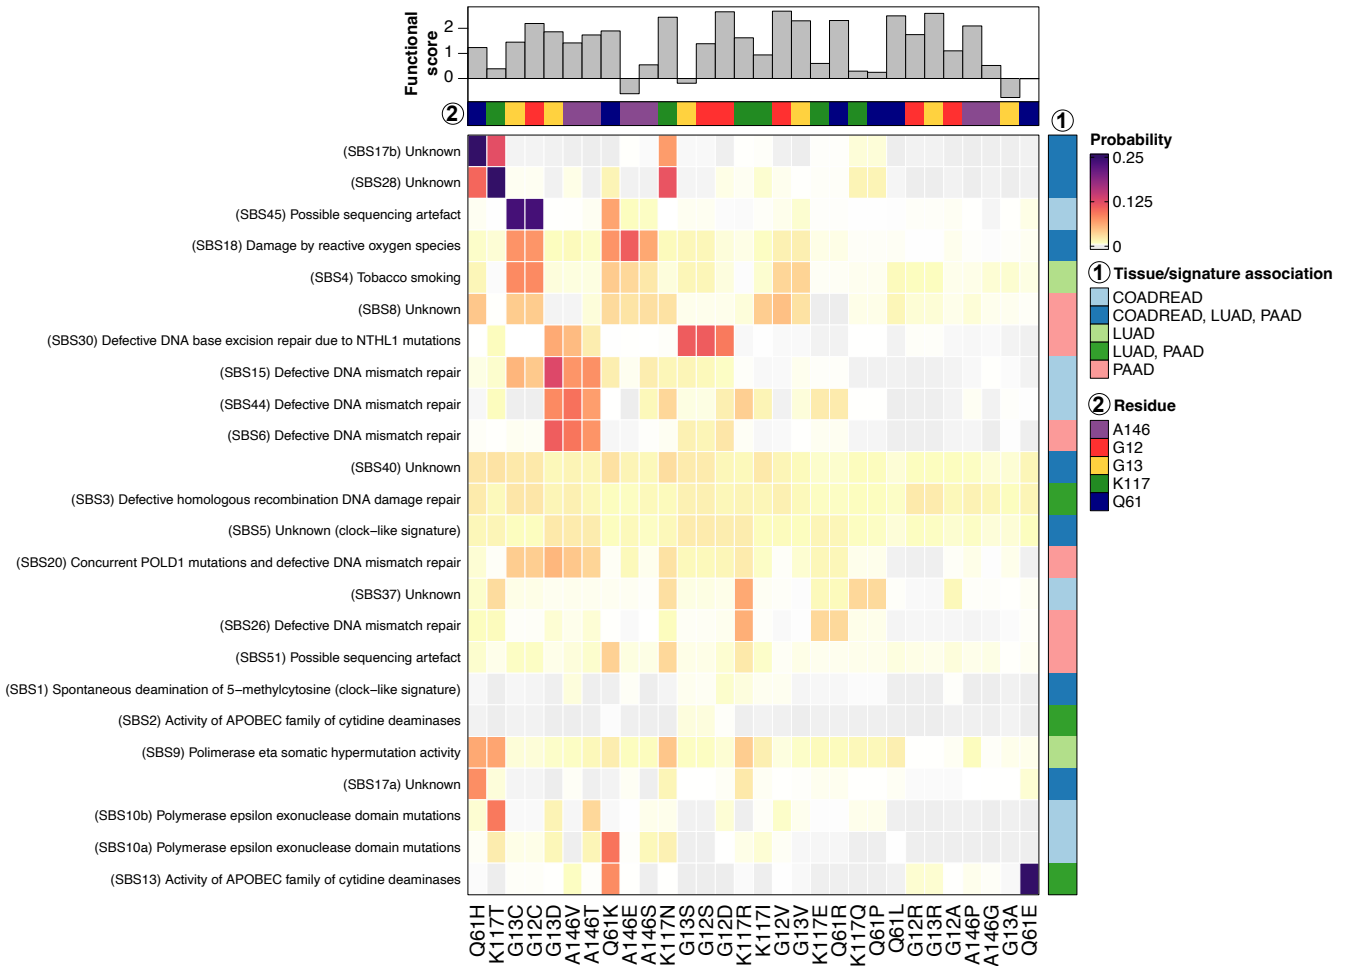

42

43 **Oncogenic KRAS variants and their associated mutational signatures.** Heatmap  
 44 depiction of (1) tissue-specific probability of mutational signatures resulting in (2) a given  
 45 KRAS mutation. Functional score from HA1E KRAS DMS GOF screen is indicated in  
 46 barplot above.

47

48

49

50

51

52 **Extended Data Fig. 4**

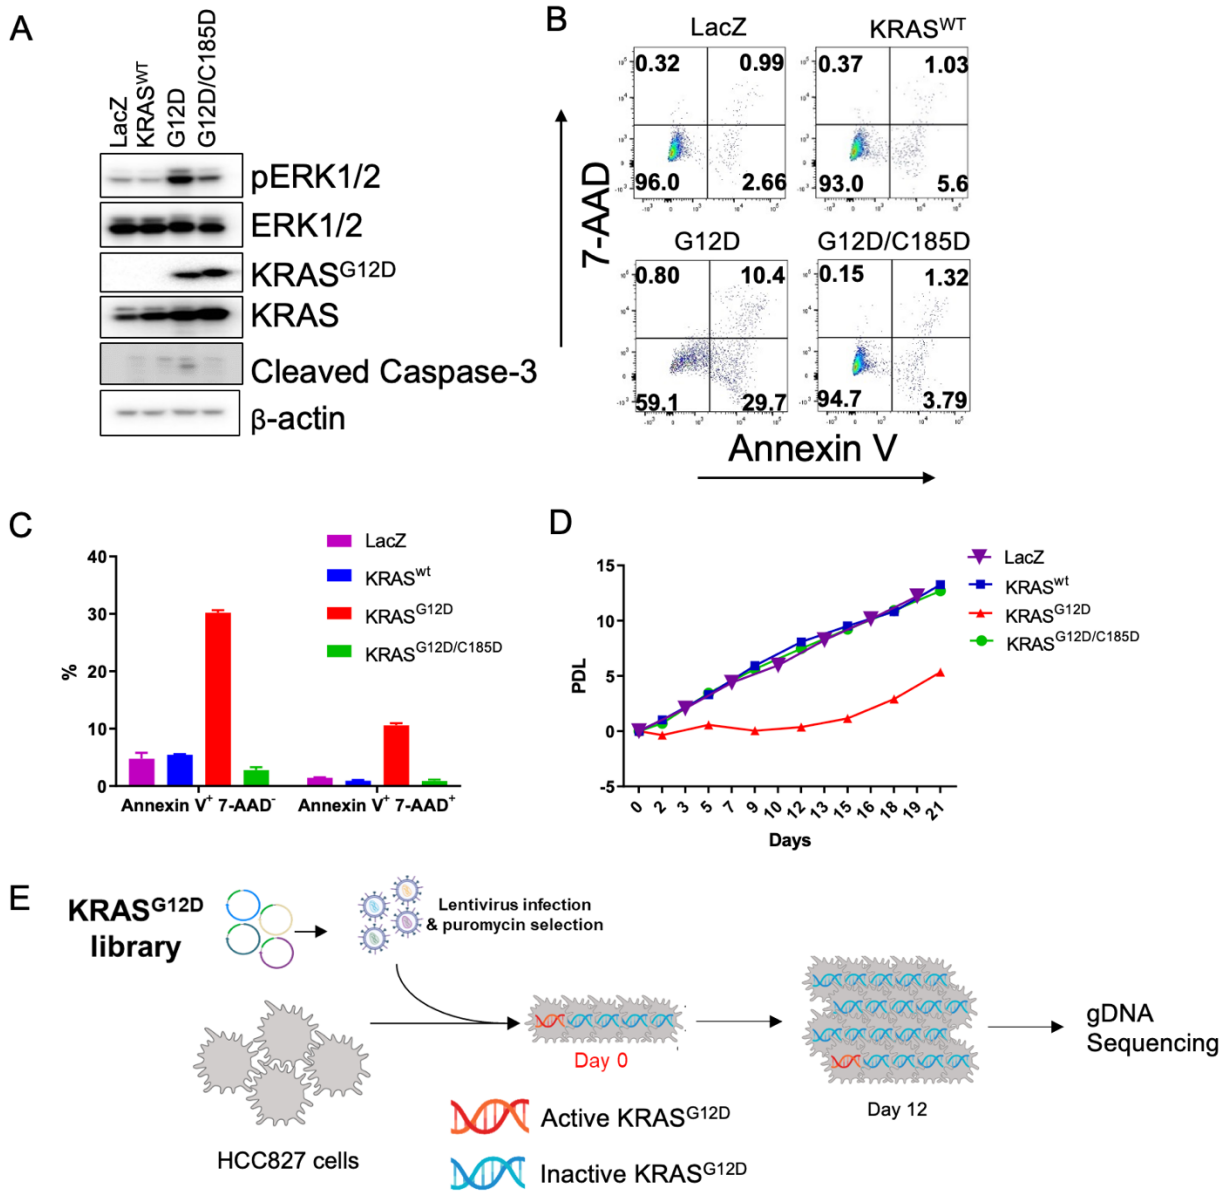

53

54 **KRAS<sup>G12D</sup> Deep Mutational Scanning (DMS) loss-of-function screen.** HCC827 cells  
 55 were transduced with lentivirus expressing LacZ, KRAS<sup>WT</sup>, KRAS<sup>G12D</sup> or KRAS<sup>G12D/C185D</sup>.  
 56 (A) KRAS expression and downstream signaling, (B) Apoptosis by flow cytometry with  
 57 FITC-annexin V and 7-AAD dual-labeling, (C) Early apoptosis (Annexin V+7-AAD-) and  
 58 late apoptosis (Annexin V+7-AAD+) are shown. (D) Population doubling level (PDL) was  
 59 monitored for 21 days. One representative of three independent experiments was shown.  
 60 (E) Schematic overview of KRAS<sup>G12D</sup> DMS loss-of-function (LOF) screen.

61 **Extended Data Fig. 5**

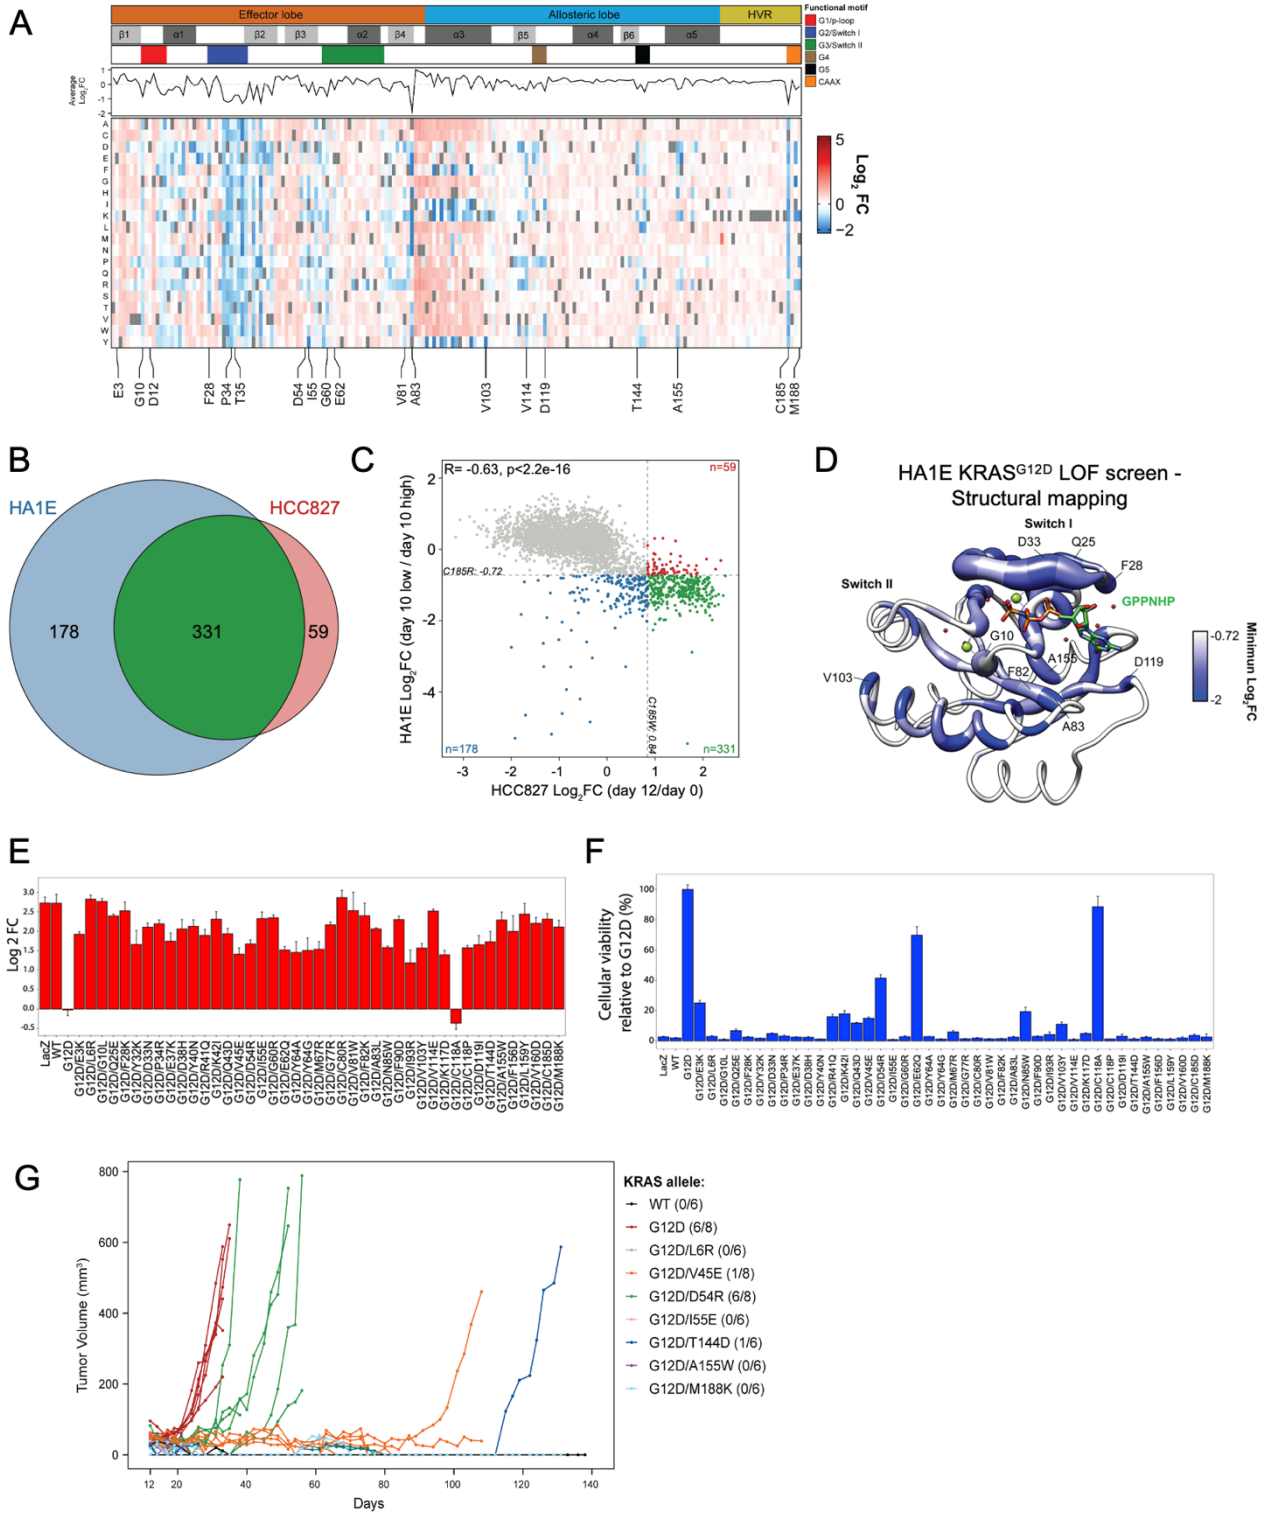

63 **Evaluation of KRAS LOF mutations and validation.** (A) Heat map representation of  
64 LFC allele enrichment (red) and depletion (blue) showing LFCs for each allele from  
65 KRAS<sup>G12D</sup> deep mutational scanning (DMS) screen. The LFC for each variant was  
66 calculated based on the Log2 fold change of normalized counts on the indicated day  
67 compared to Day 0 and Day 10 data shown for HA1E cells. Each column represents an  
68 amino acid in KRAS, and each row represents the substituted residue, and grey squares  
69 indicate missing alleles. Secondary structures, the five nucleotide-binding motifs (G1-G5),  
70 and two Switch motifs are annotated on top, followed by a line graph showing the average  
71 LFC of all substitutions per position. (B) Comparison of putative suppressor mutations  
72 against C185 benchmark in KRAS<sup>G12D</sup> HCC827 screen (red) and KRAS<sup>G12D</sup> HA1E screen  
73 (blue) with a number of overlapping and unique hits indicated in a Venn diagram, defining  
74 LOF variants with LFC scores greater. (C) Scatterplot of KRAS<sup>G12D</sup> DMS screen for  
75 second site mutants from HCC827 (x-axis) and HA1E (y-axis) screens. C185 benchmark  
76 indicated by dashed line, and second site mutant hits that are unique to the HA1E screen  
77 (blue), HCC827 screen (red), and overlapping hits (green) are indicated. (D) Mapping of  
78 maximal loss-of-function observed in HA1E DMS screen on crystal structure of KRAS<sup>G12D</sup>  
79 per residue position. The color indicated the lowest LFC of substitutions at each amino  
80 acid and the size correlates with the number of high-ranking putative suppressor  
81 mutations at each residue. 43 KRAS<sup>G12D</sup> suppressor mutants validated in (E) HA1E GILA  
82 assays, (F) HCC827 growth assays, and (G) selected variants were evaluated for *in vivo*  
83 growth.

84

85

86

87

88

89

90

91 **Extended Data Fig. 6**

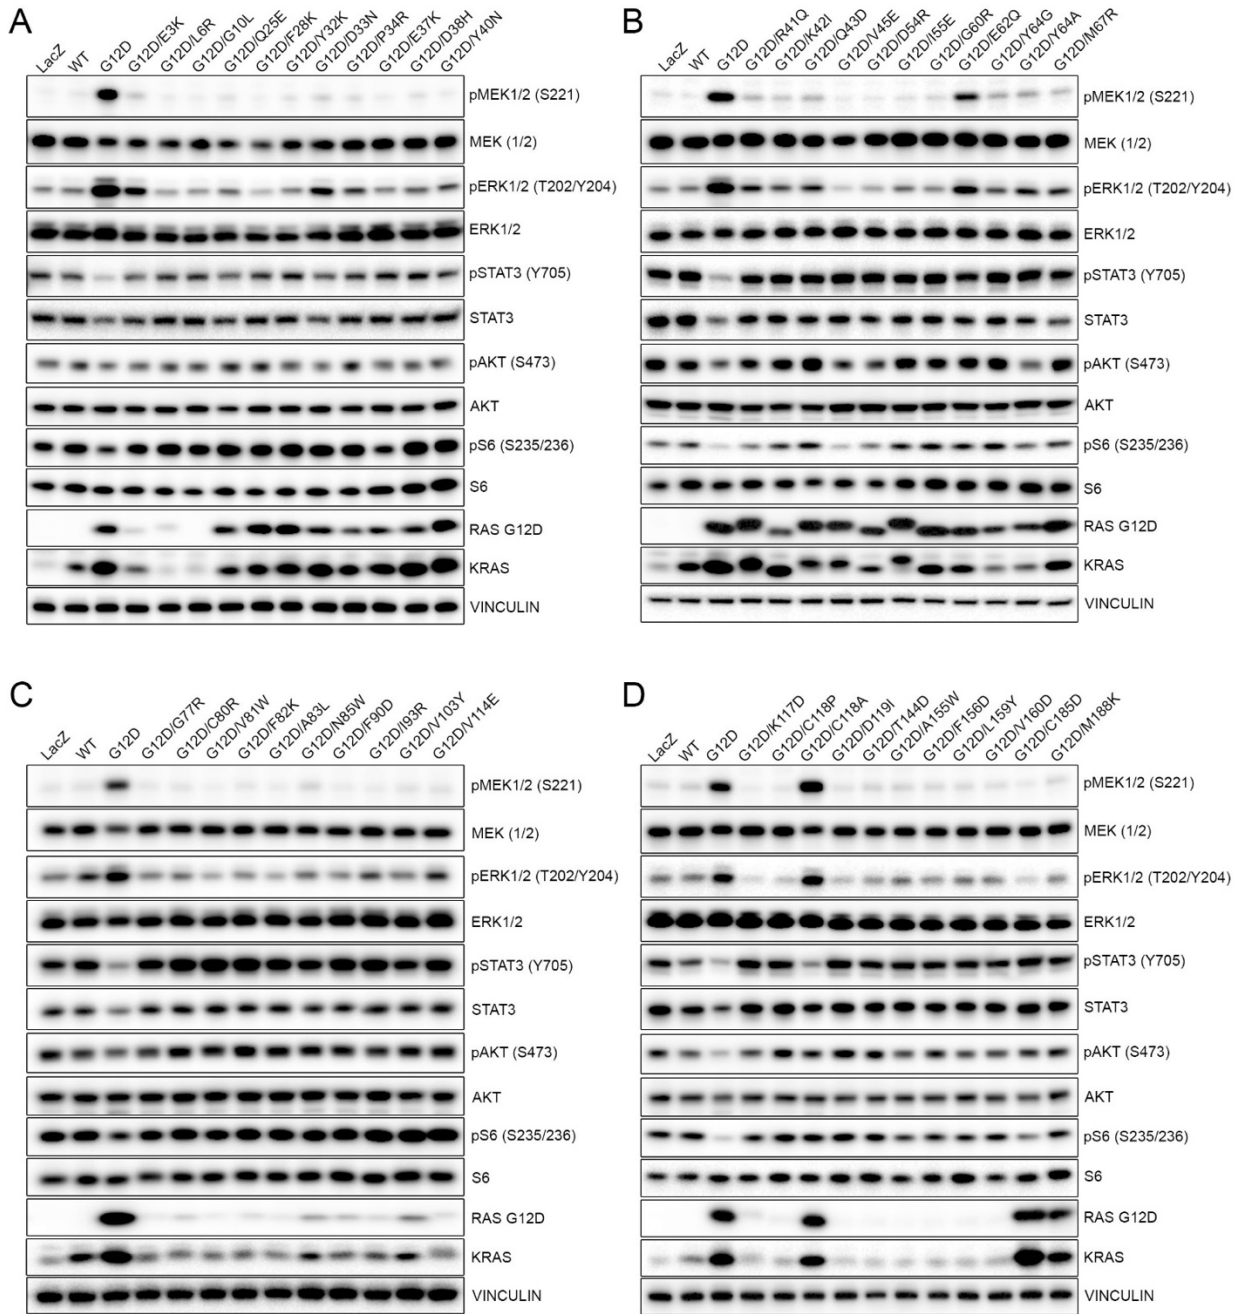

92

93 **Signaling pathways in isogenic HCC827 cell lines with KRAS<sup>G12D</sup> alleles.** HCC827  
 94 cells were transduced with lentivirus expressing indicated KRAS<sup>G12D</sup> alleles. Positive cells  
 95 were selected with puromycin and main downstream signaling molecules were checked  
 96 with western blots.



97 **Extended Data Fig. 7**

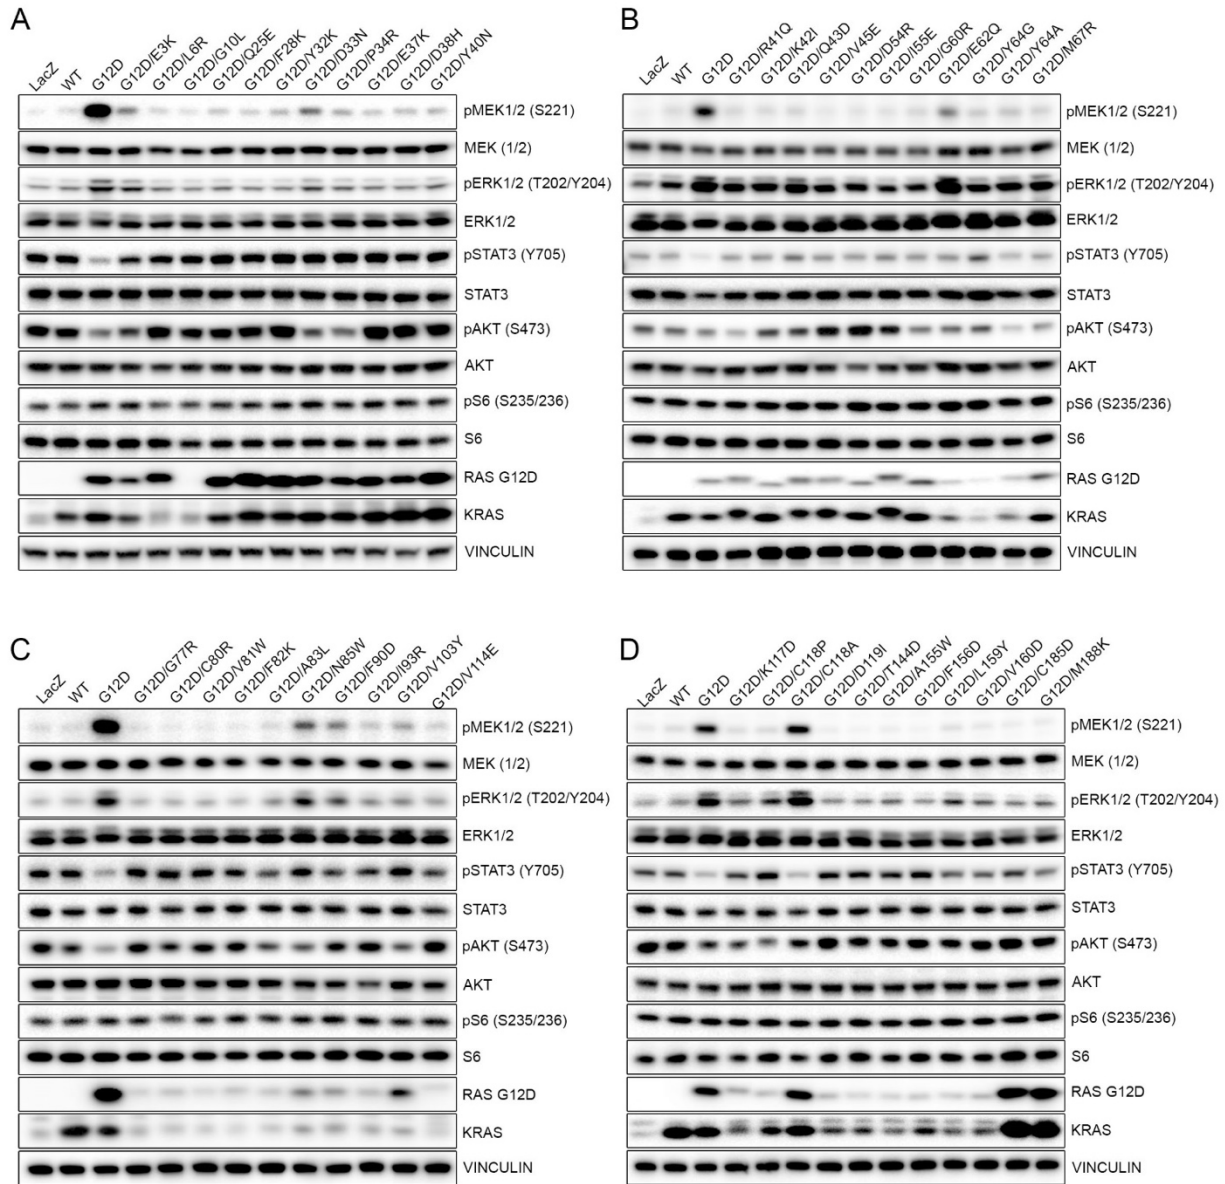

98

99 **Signaling pathways in isogenic HA1E cell lines with KRAS<sup>G12D</sup> alleles.** HA1E cells  
 100 were transduced with lentivirus expressing indicated KRAS<sup>G12D</sup> alleles and positive cells  
 101 were selected with puromycin. HA1E cell lines stably expressing individual allele were  
 102 checked for downstream signaling with western blots.

103

104

**A**

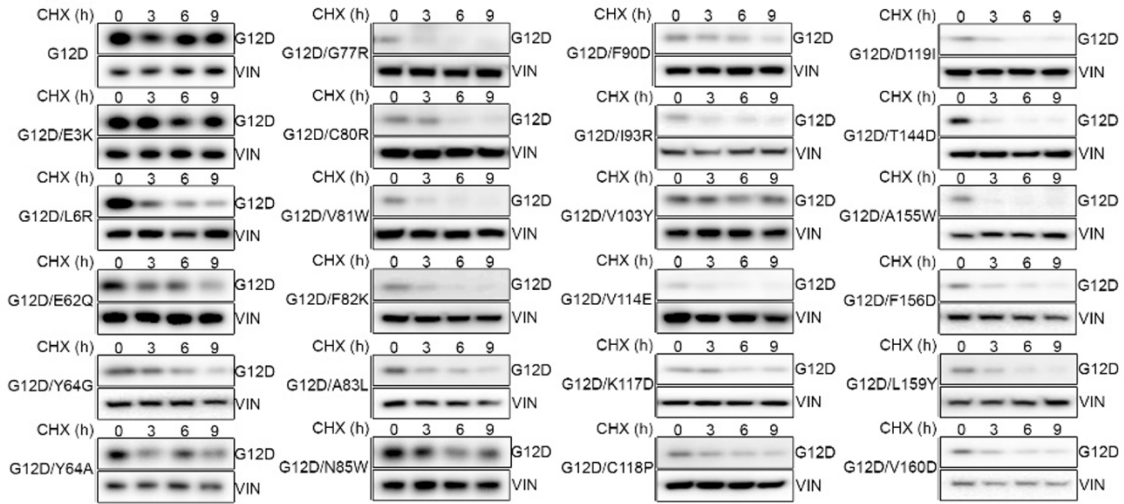

**B**

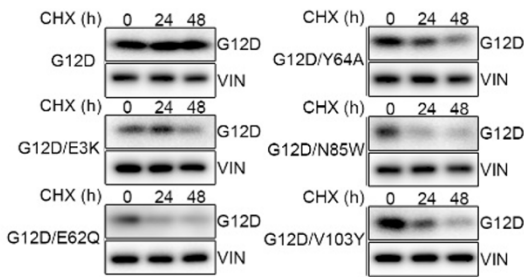

**C**

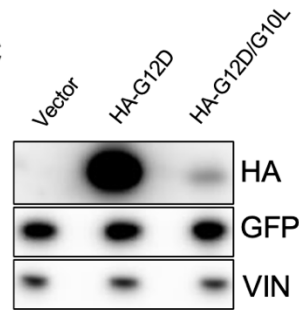

**D**

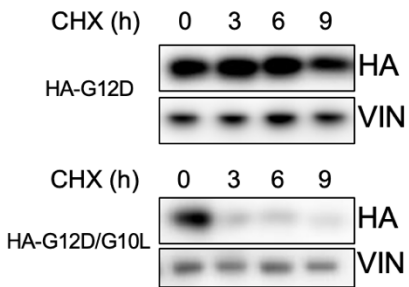

**E**

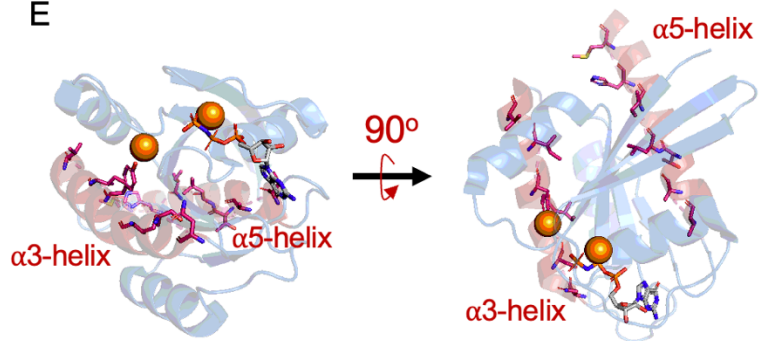

107 **Effect of secondary mutations on KRAS<sup>G12D</sup> protein stability in HA1E cells with**  
 108 **cycloheximide (CHX) treatment.** Isogenic HA1E cell lines were treated with CHX at 20  
 109 ug/ml for 0, 3h, 6h and 9h (A) or for 0, 24h and 48h (B). KRAS<sup>G12D</sup> protein level was  
 110 checked and vinculin was used as a loading control. (C) 293T cells were transfected with

111 the vector, HA-G12D or HA-G12D/G10L and protein was harvested after 48 hours. The  
112 HA-labeled KRAS and GFP level was checked and vinculin was as a loading control. (D)  
113 293T cells were transfected and cultured for 48 hours as described in (C). Then the cells  
114 were treated with CHX at 20 ug/ml for 0, 3h, 6h and 9h. The HA-KRAS expression was  
115 checked at indicated time points. (E) Structure of KRAS<sup>G12D</sup> bound to non-hydrolyzable GTP  
116 analog GPPNHP (PDB: 6GOF), with  $\alpha 3$  and  $\alpha 3$  helices indicated in red and side chain of  
117 residues contributing to the core of the protein are displayed.

118

119

120

121

122

123

124

125

126

127

128

129

130

131

132

133

134

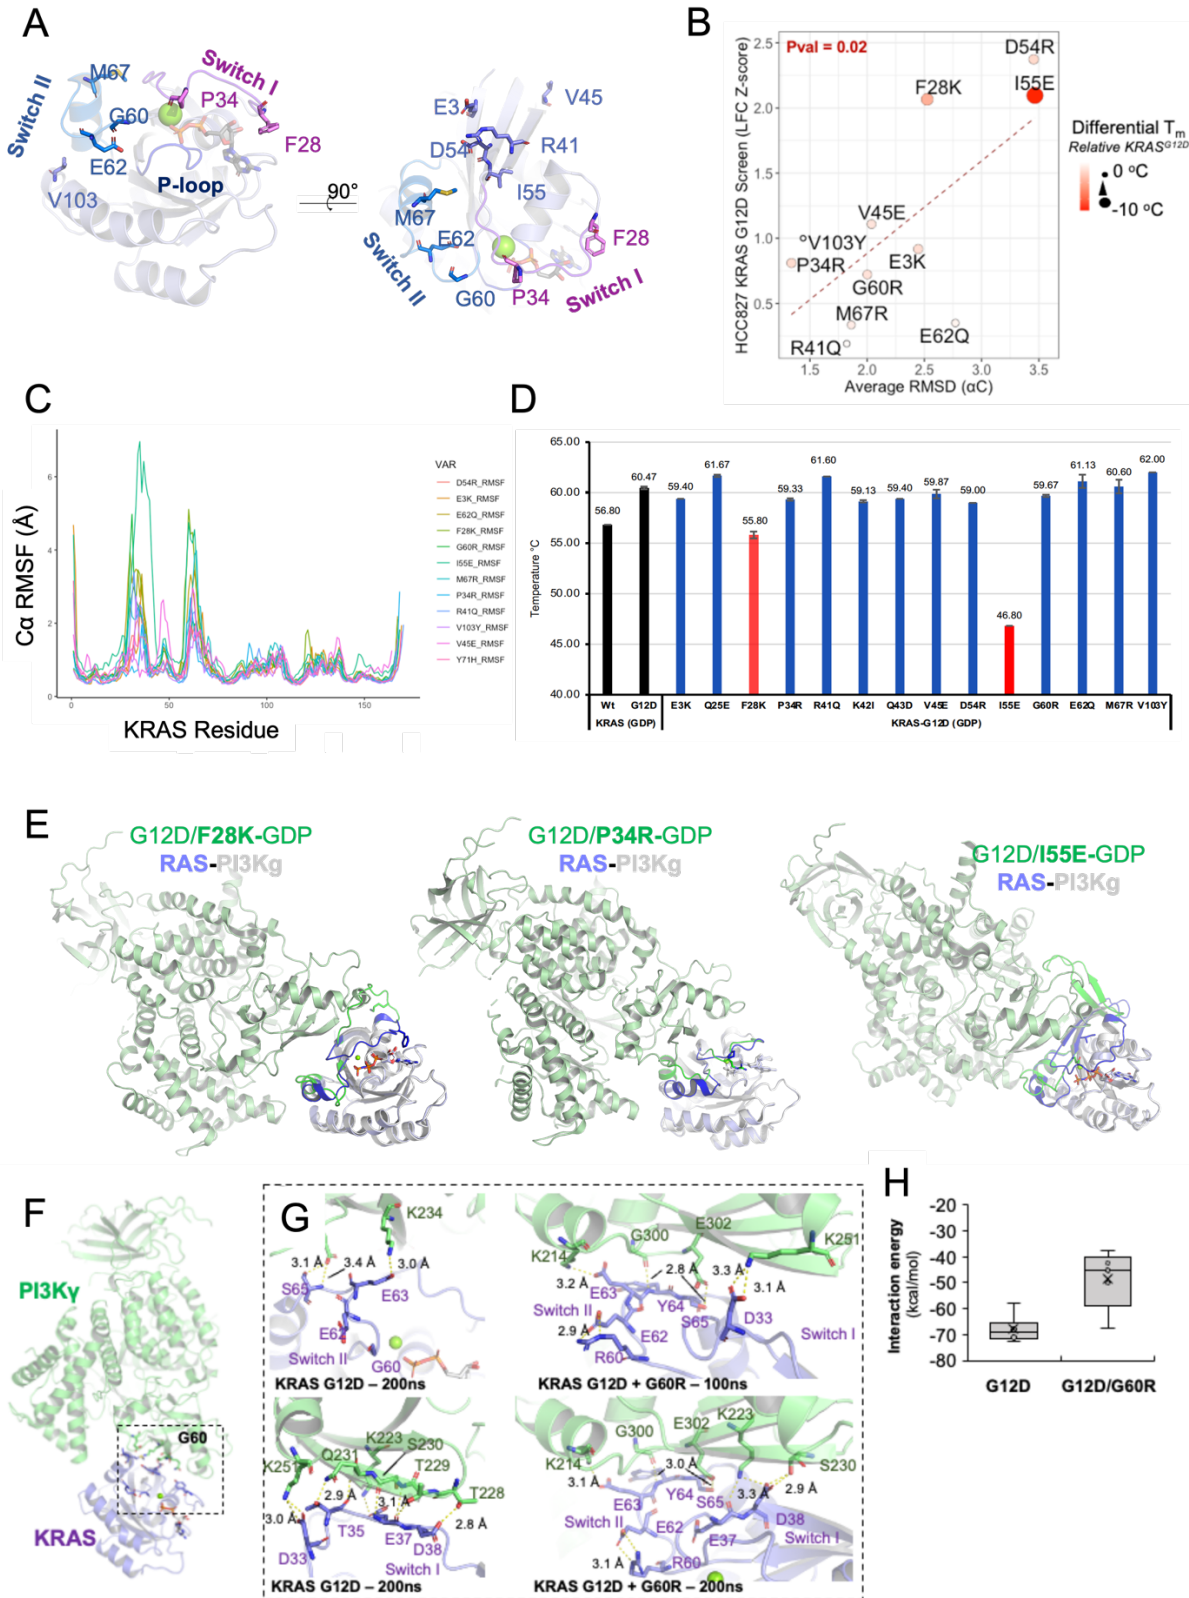

137 **Crystal structures of KRAS<sup>G12D</sup> inactivating mutants show conformational**  
138 **changes caused by mutation. (A)** The tertiary structure of active KRAS<sup>G12D</sup> (PDB:  
139 5US4) showing the position of various KRAS<sup>G12D</sup> inactivating mutants that were  
140 selected for further structural and functional studies. Side-chain atoms and GDP are  
141 shown in stick representation. P-loop is colored bright blue, as well as Switch I and II  
142 regions are colored violet and cobalt, respectively. **(B)** Scatterplot of the average alpha  
143 carbon root mean square deviation (RMSD) of each KRAS<sup>G12D</sup> suppressor mutant  
144 crystal structure during a 200ns molecular dynamics (MD) simulation (x-axis) and the  
145 functional LFC from the KRAS<sup>G12D</sup> suppressor DMS screen (y-axis). Size of points  
146 indicates the differential melting temperature of each variant compared to KRAS<sup>G12D</sup>.  
147 **(C)** The root mean square fluctuation (RMSF) of C $\alpha$  movement across a 100ns MD  
148 course for each position of KRAS<sup>G12D</sup> inactivating mutant structures. **(D)** Bar graph  
149 showing melting temperature (T<sub>m</sub>) of GDP-bound WT KRAS, G12D, and G12D  
150 inactivating mutant proteins. Results are plotted as mean  $\pm$  S.D ( $n = 3$ ). **(E)** Global view  
151 of superimposed G12D/F28K (left), G12D/P34R (middle) and G12D/I55E (right). **(F)**  
152 Global view of KRAS<sup>G12D</sup> modeled into HRAS-PI3K $\gamma$  complex (PDB 1HE8) with G60  
153 residue indicated (stick representation). **(G)** Enlarged view comparing KRAS<sup>G12D</sup> and  
154 G12D/G60R sidechain interactions before and after 100ns MD simulation. **(H)** Box and  
155 whisker plot of KRAS-PI3K $\gamma$  interaction energy calculation predicted by Amber10 force-  
156 field-based on five representative MD simulation frames.

157

158

159

160

161

162

163

164

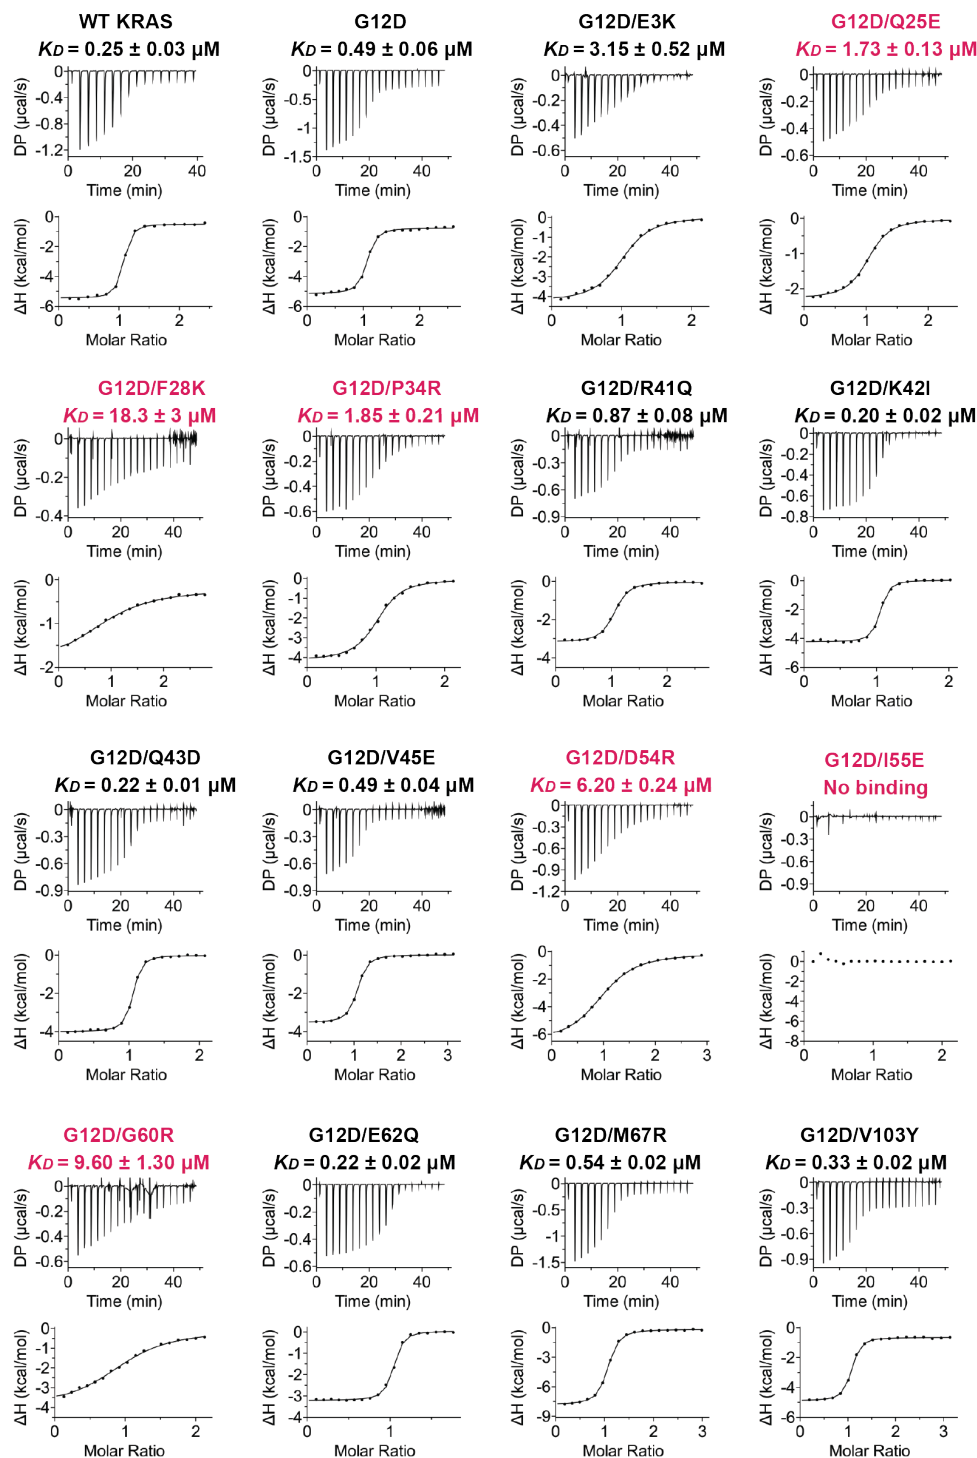

166

167 **Binding affinity measurements of KRAS<sup>G12D</sup> inactivating mutants with RAF1-RBD.**

168 The dissociation constant of GMPPNP-bound WT KRAS, G12D, and G12D inactivating

169 mutants with RAF1-RBD was measured using ITC experiments.

170 **Extended Data Fig. 11**

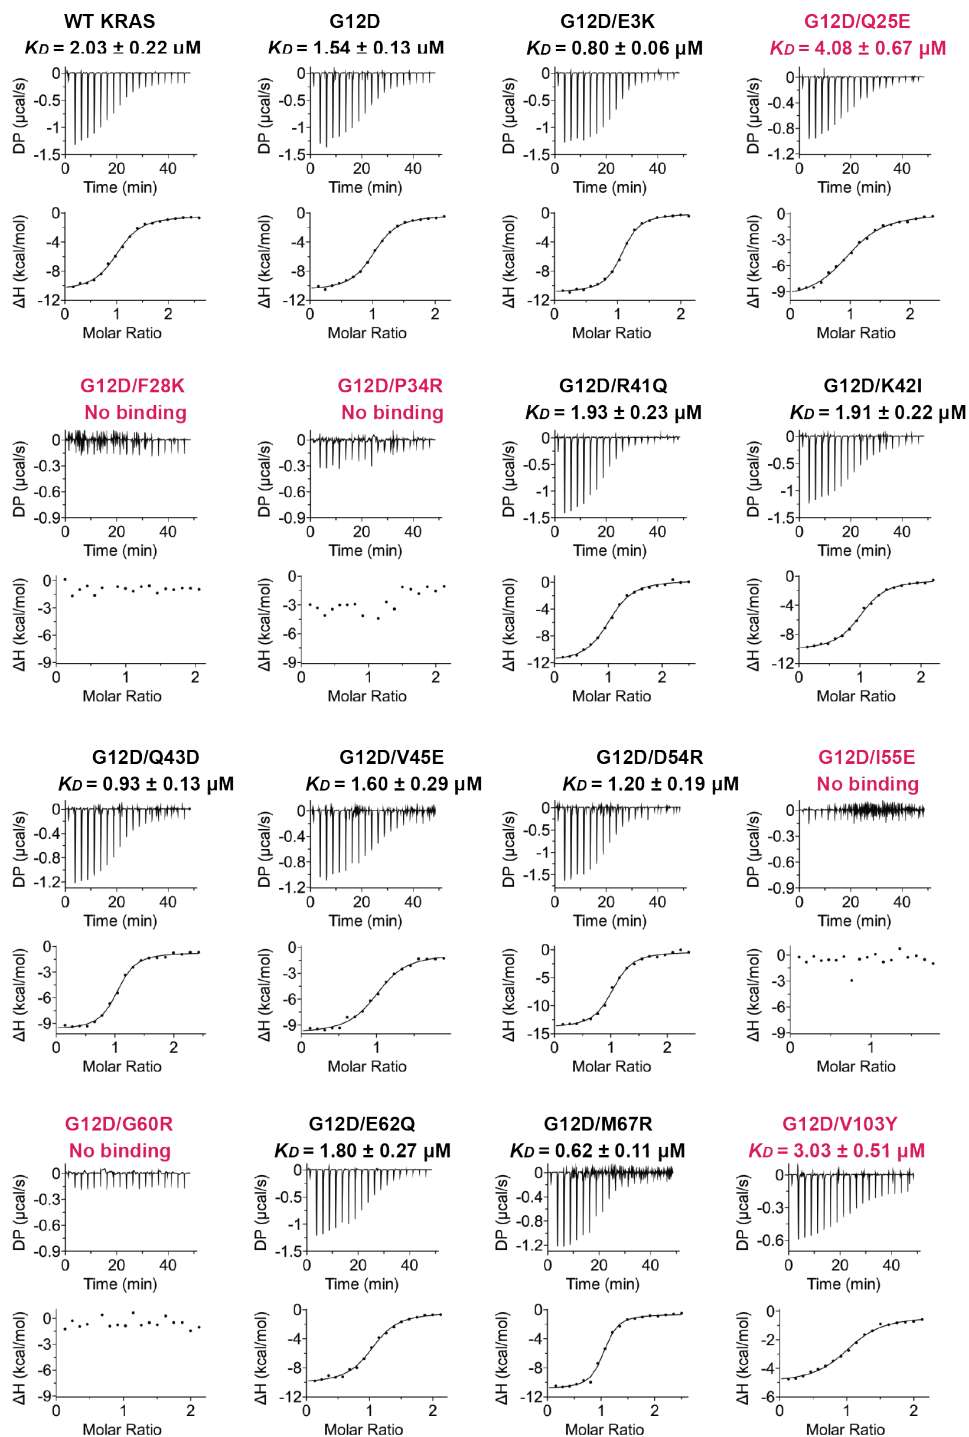

171

172 **Binding affinity measurements of KRAS<sup>G12D</sup> inactivating mutants with PI3K $\gamma$ .** The  
 173 dissociation constant of GMPNP-bound WT KRAS, G12D, and G12D inactivating  
 174 mutants with PI3K $\gamma$  was measured using ITC experiments.

175 **Extended Data Fig. 12**

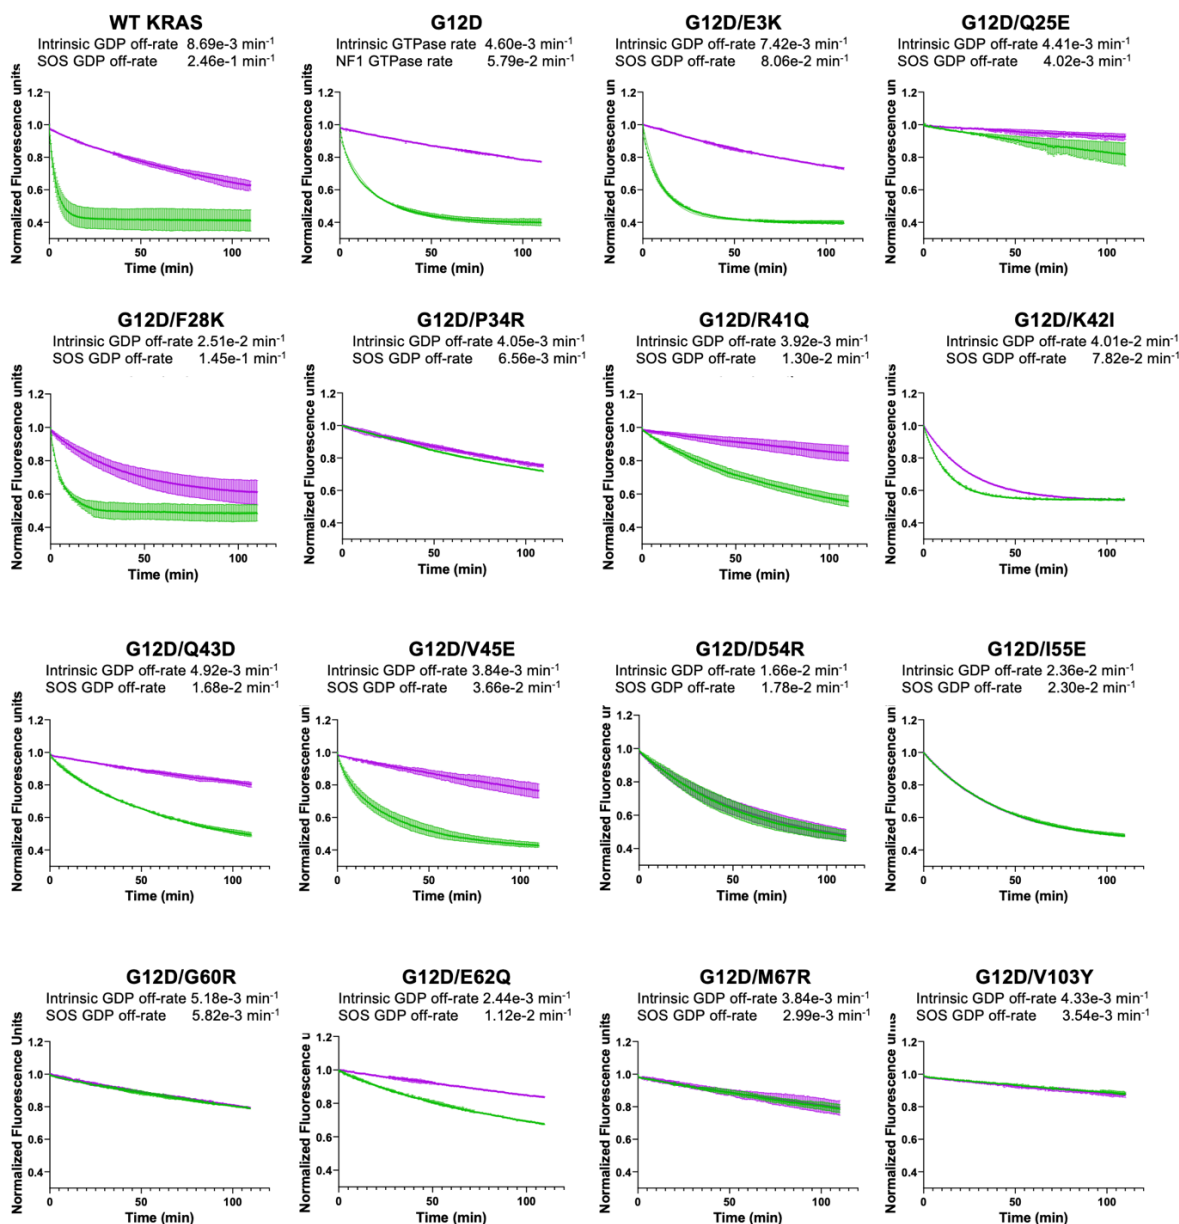

176

177 **Intrinsic and SOS<sub>cat</sub> mediated GDP exchange activity in KRAS<sup>G12D</sup> inactivating**  
 178 **mutants.** MANT-GDP exchange from 1.5  $\mu\text{M}$  was measured in the absence (purple

179 curve) or presence (green curve) of 2.5  $\mu\text{M}$  SOS<sub>cat</sub> in 40 mM Tris-HCl (pH 7.5), 150 mM

180 NaCl, 2 mM MgCl<sub>2</sub>, and 1 mM TCEP. The mean of replicate experiments is plotted, and

181 error bars represent the standard deviation. Dissociation rates were calculated by fitting

182 the data to a single exponential decay and expressed with 95% confidence intervals to

183 show the goodness of fit.



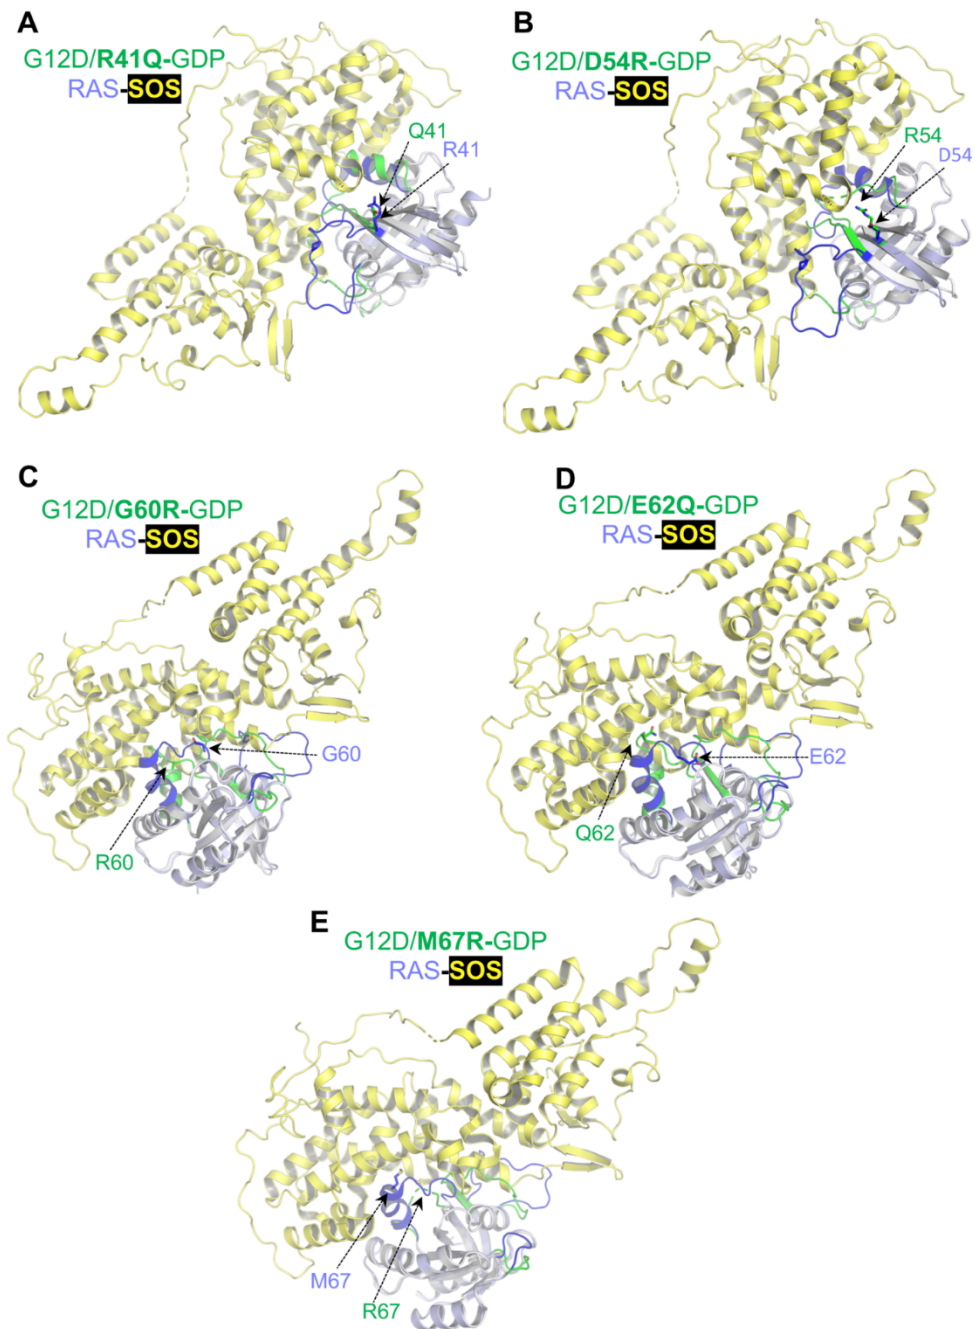

185

186 **Impact of KRAS<sup>G12D</sup> inactivating mutation on RAS-SOS interaction. (A-F)** Structural  
187 superposition of G12D inactivating mutants F28K (A), G60R (B), R41Q (C), Q43R (D),  
188 E62Q (E), and M67R (F) with HRAS bound at the catalytic site in the HRAS-SOS complex

189 shows the impact of inactivating mutations on RAS-SOS interaction. SOS is colored  
190 yellow, and regions that undergo conformational changes in WT HRAS and KRAS<sup>G12D</sup>  
191 inactivating mutant structures are highlighted in blue and green. Side-chain atoms of the  
192 inactivating residue and GMPPNP are shown in stick representation.

193

194

195

196

197

198

199

200

201

202

203

204

205

206

207

208

209

210

211

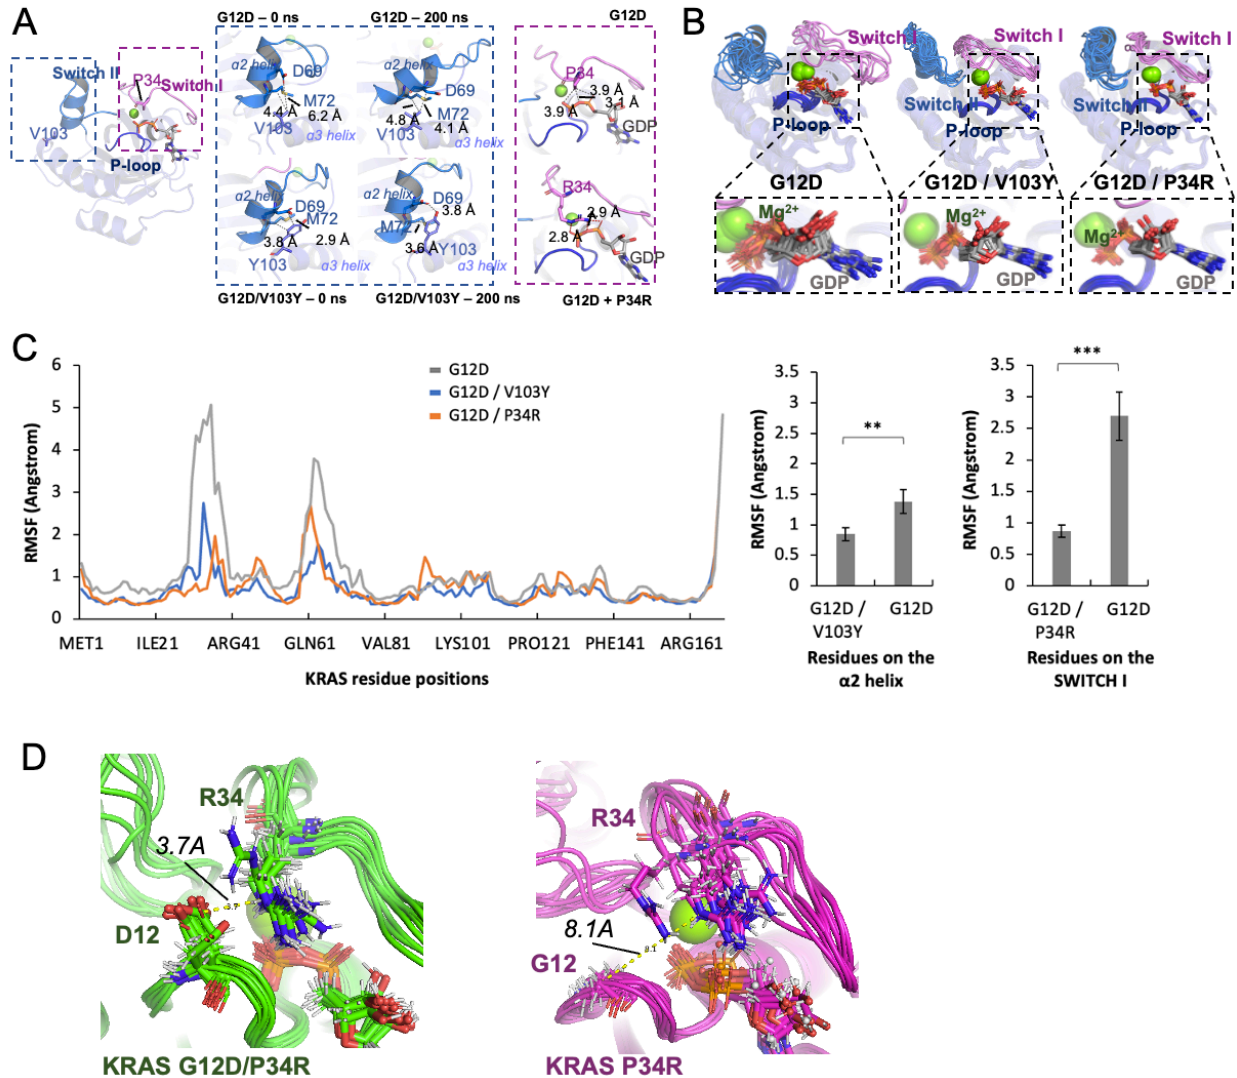

213

214 **MD simulation of KRAS<sup>G12D</sup> inactivating mutation and impact on GTP binding**

215 **pocket. (A)** Global view of residues P34 and V103 indicated (stick representation) on

216 KRAS<sup>G12D</sup> crystal structure (PDB 5US4). Enlarged view of structural analyses comparing

217 KRAS<sup>G12D</sup> versus inactivating mutant structures G12D/V103Y and G12D/P34R. (B)

218 Superposition of 100ns MD simulation frames for KRAS<sup>G12D</sup>, G12D/V103Y, and

219 G12D/P34R, with inset of GDP. (C) Per-residue root-mean-square-fluctuation (RMSF)

220 from 100 ns molecular dynamics (MD) simulations of the KRAS<sup>G12D</sup> (gray trace),

221 KRAS<sup>G12D/V103Y</sup> (blue trace), and KRAS<sup>G12D/P34R</sup> (orange trace). Mean RMSF values

222 calculated during MD simulations for residues on the  $\alpha$ 2 helix (S65–E76) are plotted for

223 the KRAS<sup>G12D/V103Y</sup> and KRAS<sup>G12D</sup>. Mean RMSF values calculated during MD simulations  
224 for residues on the switch-I (Q25-Y40) are plotted for the KRAS<sup>G12D/P34R</sup> and KRAS<sup>G12D</sup>.  
225 Comparison between two groups was performed using an unpaired, two-tailed Student's  
226 t-test. Error bars represent standard errors. \*\*p<0.01, \*\*\*p<0.001. (D) Superpositions of  
227 MD trajectories of 100ns simulations on KRAS<sup>G12D/P34R</sup> (green) and KRAS<sup>P34R</sup> (magenta).  
228 Proteins are shown in cartoons. Key residues and GDP are shown in sticks.

229

230

231

232

233

234

235

236

237

238

239

240

241

242

243

244

245

246

247 **Extended Data Fig. 15**

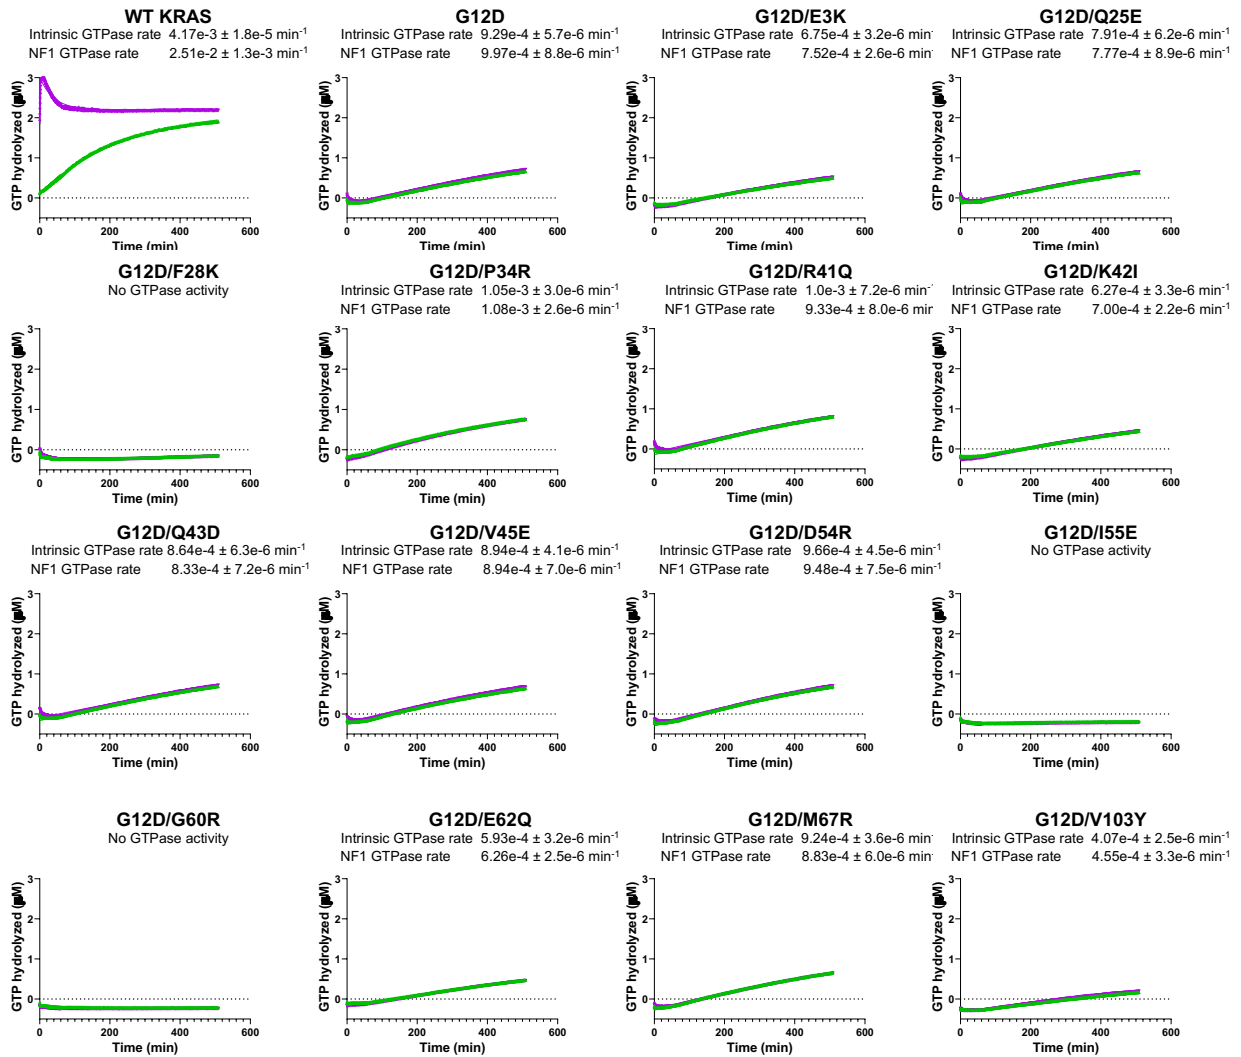

248

249 **Intrinsic and NF1 GAP mediated GTPase activity in KRAS<sup>G12D</sup> inactivating mutants.**

250 GTP hydrolysis of 3 µM KRAS-GTP in the absence (green curve) or presence (purple

251 curve) of 100 nM NF1 GAP, 50 mM Tris, pH 7.6, 150 mM NaCl, 2 mM MgCl<sub>2</sub> and 1 mM

252 DTT was measured using the Phosphate Sensor assay. The mean of replicate

253 experiments is plotted, and error bars represent the standard deviation. Hydrolysis rates

254 are calculated by non-linear regression analysis and expressed with 95% confidence

255 intervals to show the goodness of fit.

256

257

258 **Extended Data Fig. 16**

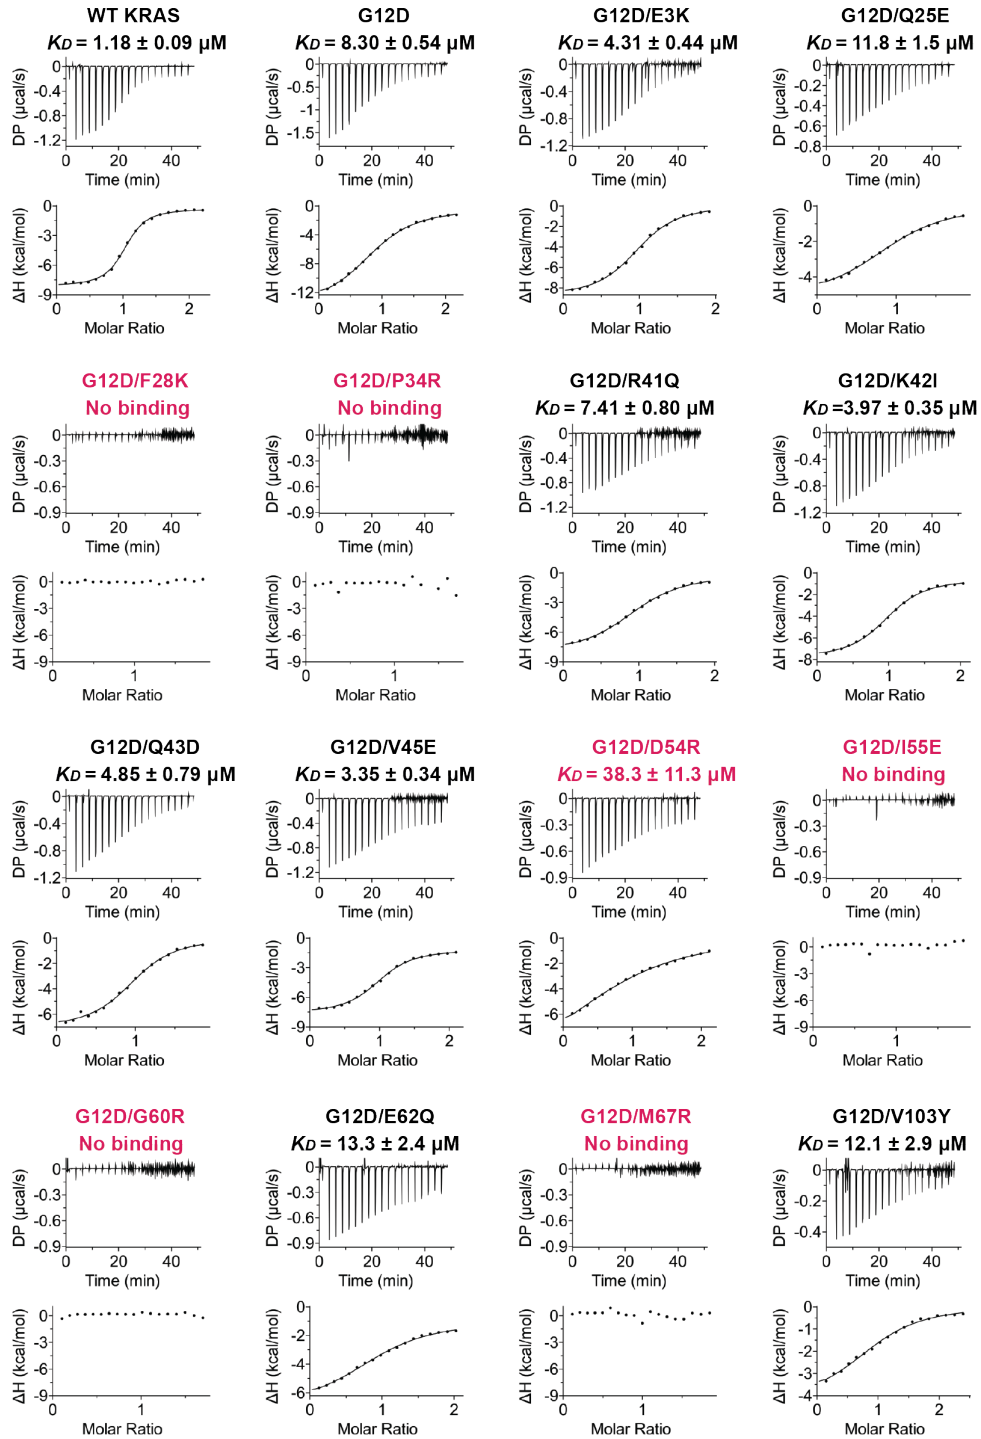

259

260 **Binding affinity measurements of KRAS<sup>G12D</sup> inactivating mutants with RasGAP**  
 261 **NF1(GRD).** The dissociation constant of GMPPNP-bound WT KRAS, G12D, and G12D  
 262 inactivating mutants with NF1(GRD) was measured using ITC titration experiments.
